# Supplementary material
Source: Research Square preprint supplement (doi:10.21203/rs.3.rs-9376746/v1)
Supplement: Supplementary file 1 [file 5433bcae2ae6a85058dae1b0.xlsx]

## Sheet: Table 2
Table 2. Brain activation under the contrast of 'Tools' vs. all the other conditions in patients (N=26) and healthy volunteers (N=19) together.
cluster level		peak level
p(FWE-corrected)	voxel count	t value	p (uncorrected)	x	y	z	anotomical region
<0.001	8545	13.4549	4.44089e-16	-45.5	-69.5	-1.5	Occipital_Mid_L
		12.7539	4.44089e-16	44.5	-66.5	-5	Temporal_Inf_R
		12.723	4.44089e-16	-33.5	-87.5	5.5	Occipital_Mid_L
		11.8246	1.66533e-15	-42.5	-57.5	-8.5	Temporal_Inf_L
		10.9649	1.83187e-14	-30.5	-51.5	54.5	Parietal_Sup_L
		10.7676	3.27516e-14	-24.5	-78.5	33.5	Occipital_Mid_L
		9.76033	7.02327e-13	26.5	-60.5	54.5	Parietal_Sup_R
		9.48525	1.66156e-12	29.5	-78.5	26.5	Occipital_Mid_R
		9.1482	4.83269e-12	-30.5	-9.5	51	Precentral_L
		8.52737	3.57283e-11	-48.5	-0.5	40.5	Precentral_L
		8.25525	8.69814e-11	-9.5	11.5	51	Supp_Motor_Area_L
		8.21766	9.84129e-11	-54.5	-24.5	37	Parietal_Inf_L
		7.92501	2.58523e-10	-3.5	2.5	58	Supp_Motor_Area_L
		7.85153	3.29855e-10	35.5	-84.5	2	Occipital_Mid_R
		7.69371	5.57549e-10	-36.5	-39.5	40.5	Parietal_Inf_L
		7.67037	6.02639e-10	32.5	-3.5	51	Frontal_Mid_2_R
		7.14364	3.52197e-09	-6.5	-6.5	68.5	Supp_Motor_Area_L
		7.11827	3.83618e-09	5.5	14.5	54.5	Supp_Motor_Area_R
		7.01475	5.43838e-09	-33.5	-42.5	-19	Fusiform_L
		6.77724	1.21323e-08	35.5	-42.5	44	Parietal_Inf_R
		6.62076	2.06039e-08	-3.5	-63.5	-15.5	Cerebelum_4_5_L
		6.34312	5.27795e-08	-48.5	8.5	26.5	Frontal_Inf_Oper_L
		6.20166	8.52398e-08	11.5	-69.5	-19	Cerebelum_6_R
		6.15358	1.00317e-07	23.5	-63.5	-22.5	Cerebelum_6_R
		6.09811	1.2105e-07	-36.5	-66.5	-22.5	Cerebelum_6_L
		5.56922	7.21959e-07	-39.5	5.5	30	Precentral_L
		5.55265	7.63318e-07	-60.5	5.5	23	Precentral_L
		5.54675	7.78602e-07	11.5	-72.5	-40	Cerebelum_8_R
		5.52101	8.4893e-07	-30.5	20.5	9	Insula_L
		5.4609	1.03871e-06	41.5	-36.5	58	Postcentral_R
		5.39035	1.3157e-06	47.5	5.5	33.5	Precentral_R
		5.37274	1.39559e-06	44.5	-30.5	44	Postcentral_R
		5.29012	1.83934e-06	50.5	8.5	40.5	Precentral_R
		5.2699	1.96774e-06	20.5	-69.5	-47	Cerebelum_8_R
		4.95827	5.53267e-06	29.5	-42.5	-22.5	Cerebelum_4_5_R
		4.74572	1.11113e-05	-39.5	14.5	5.5	Insula_L
		4.73019	1.1689e-05	23.5	-57.5	-54	Cerebelum_8_R
		4.54087	2.15984e-05	26.5	-48.5	-50.5	Cerebelum_8_R
		4.47281	2.68867e-05	-48.5	5.5	5.5	Frontal_Inf_Oper_L
		4.44461	2.94322e-05	-57.5	11.5	2	Frontal_Inf_Oper_L
		4.4433	2.95558e-05	53.5	-21.5	51	Postcentral_R
		4.43466	3.0386e-05	-48.5	-39.5	26.5	SupraMarginal_L
		4.36516	3.794e-05	-15.5	-81.5	9	Calcarine_L
		4.24279	5.59376e-05	-33.5	-21.5	65	Precentral_L
		3.97232	0.000130153	23.5	-39.5	72	Postcentral_R
		3.73134	0.000271285	8.5	17.5	37	Cingulate_Mid_R
		3.71986	0.000280817	-3.5	-30.5	68.5	Paracentral_Lobule_L
4.83e-07	515	6.60912	2.14323e-08	29.5	23.5	9	Insula_R
		5.26351	2.01014e-06	35.5	44.5	23	Frontal_Mid_2_R
		4.83418	8.31978e-06	44.5	23.5	2	Frontal_Inf_Tri_R
		4.42889	3.09519e-05	50.5	11.5	12.5	Frontal_Inf_Oper_R
		4.24172	5.61278e-05	17.5	5.5	12.5	Caudate_R
		3.49723	0.000543541	29.5	2.5	2	Putamen_R
		3.46628	0.000594957	20.5	47.5	19.5	Frontal_Sup_2_R
Footnote: Brain activation was thresholded with p<0.001 (uncorrected) at the voxel level and p<0.05 (FWE corrected) at the cluster level. The anatomical locations for the peak coordinates were obtained with the AAL3 toolbox.

## Sheet: Table 3
Table 3. Brain activation under the contrast of 'Bodies' vs. all the other conditions in patients (N=26) and healthy volunteers (N=19) together.
cluster level		peak level
p(FWE-corr)	voxel count	t-value	p (uncorrected)	x	y	z	anotomical region
<0.001	13161	17.0564	4.44089e-16	47.5	-75.5	-1.5	Temporal_Mid_R
		12.2203	6.66134e-16	5.5	20.5	47.5	Supp_Motor_Area_R
		11.9375	1.33227e-15	44.5	-48.5	-19	Fusiform_R
		11.6497	2.66454e-15	-48.5	-75.5	9	Occipital_Mid_L
		10.3137	1.28009e-13	35.5	-45.5	44	Parietal_Inf_R
		10.1686	1.99174e-13	32.5	2.5	65	Frontal_Sup_2_R
		9.98876	3.46057e-13	41.5	23.5	-1.5	Insula_R
		9.79533	6.2983e-13	53.5	14.5	33.5	Frontal_Inf_Oper_R
		9.64187	1.01641e-12	50.5	5.5	44	Precentral_R
		9.16234	4.61964e-12	44.5	11.5	23	Frontal_Inf_Tri_R
		8.87906	1.14436e-11	-42.5	2.5	37	Precentral_L
		8.70313	2.01922e-11	-30.5	-3.5	51	Frontal_Mid_2_L
		8.661	2.31454e-11	38.5	41.5	30	Frontal_Mid_2_R
		8.61987	2.6449e-11	26.5	-66.5	51	Parietal_Sup_R
		8.33605	6.67352e-11	-27.5	-60.5	44	Parietal_Sup_L
		8.03765	1.78096e-10	32.5	-54.5	-29.5	Cerebelum_6_R
		7.80581	3.83956e-10	56.5	-45.5	19.5	Temporal_Sup_R
		7.52914	9.65735e-10	-9.5	-72.5	-22.5	Cerebelum_6_L
		7.13844	3.58425e-09	-42.5	-54.5	-15.5	Fusiform_L
		7.03632	5.05666e-09	-30.5	26.5	2	Insula_L
		6.94227	6.94556e-09	-54.5	17.5	26.5	Frontal_Inf_Tri_L
		6.84103	9.77831e-09	-21.5	-0.5	72	Frontal_Sup_2_L
		6.67408	1.72003e-08	-39.5	-63.5	-29.5	Cerebelum_Crus1_L
		6.52048	2.89367e-08	-57.5	-54.5	16	Temporal_Mid_L
		6.35958	4.99162e-08	14.5	-6.5	9	Thal_VL_R
		6.346	5.22667e-08	-9.5	-0.5	75.5	Supp_Motor_Area_L
		6.22448	7.88975e-08	-54.5	-42.5	26.5	SupraMarginal_L
		5.69589	4.71336e-07	-27.5	-66.5	-47	Cerebelum_8_L
		5.48147	9.69432e-07	17.5	-6.5	-12	Hippocampus_R
		5.28202	1.88974e-06	5.5	8.5	30	Cingulate_Mid_R
		5.06743	3.8572e-06	59.5	-18.5	37	Postcentral_R
		4.92335	6.20733e-06	5.5	-54.5	-12	Vermis_4_5
		4.89469	6.82103e-06	11.5	-75.5	-40	Cerebelum_7b_R
		4.86325	7.56312e-06	-6.5	2.5	30	ACC_sup_L
		4.65207	1.50713e-05	59.5	-30.5	-19	Temporal_Inf_R
		4.48704	2.56857e-05	2.5	-60.5	-22.5	Vermis_6
		4.19172	6.57062e-05	8.5	-18.5	-12	Red_N_R
		4.16187	7.21631e-05	20.5	-12.5	19.5	Caudate_R
		4.15551	7.36176e-05	-0.5	-60.5	-33	Vermis_8
		4.06946	9.6323e-05	-18.5	-12.5	23	Caudate_L
		4.05162	0.00010182	-48.5	5.5	9	Frontal_Inf_Oper_L
		3.91503	0.000155238	17.5	-69.5	-43.5	Cerebelum_8_R
		3.60599	0.000394529	-45.5	-30.5	19.5	Rolandic_Oper_L
		3.47851	0.000574113	29.5	2.5	2	Putamen_R
Footnote: Brain activation was thresholded with p<0.001 (uncorrected) at the voxel level and p<0.05 (FWE corrected) at the cluster level. The anatomical locations for the peak coordinates were obtained with the AAL3 toolbox.
