# Supplementary material
Source: Research Square preprint supplement (doi:10.21203/rs.3.rs-9376746/v1)
Supplement: Supplementary file 1 [file c5a811f283947f464ce51ef8.docx]

**Table 1.** Participant demographic and neuropsychological characteristics

|  | **Patients (n = 26)** | **Controls (n = 19)** | **p** |
| --- | --- | --- | --- |
| Age, years | 58.0 ± 13.5 | 60.5 ± 14.1 | ns |
| Sex (F/M) | 9/17 | 12/7 | — |
| Education, years | 14.2 ± 2.9 | — | — |
| Months post-stroke | 29.8 ± 15.2 | — | — |
| Lesion volume, mm³ | 8830 ± 8188 | — | — |
| Gesture imitation, % correct | 90.6 ± 8.4 | 99.2 ± 1.8ᵃ | 0.002 |
| Gesture production, % correct | 94.2 ± 11.2 | 98.5 ± 2.1ᵃ | 0.03 |
| 1-back miss rate, % | 6.2 ± 4.8 | 1.5 ± 1.2ᵃ | 0.012 |
| 1-back false positive rate, % | 8.9 ± 5.3 | 2.3 ± 1.8ᵃ | 0.033 |

*Values are mean ± SD unless otherwise indicated. ns = not significant.*

*ᵃ Control values estimated; controls performed at/near ceiling on behavioural tasks.*
